# Supplementary figures and images for: Kollegiale Hilfe (KoHi) – Beschreibung des Interventionsprogramms zur Reduktion der Auswirkung belastender Arbeitssituationen im Sinne des Second-Victim-Phänomens bei patientennah tätigem Personal in der Klinik Hietzing, Wien, Österreich (KoHi-II-Studie)
Source: Springer Nature journal article supplement (doi:10.1007/s40664-023-00517-w), 2023-10-06

# Anlage

**Fragebogen 2 (FB 2)**


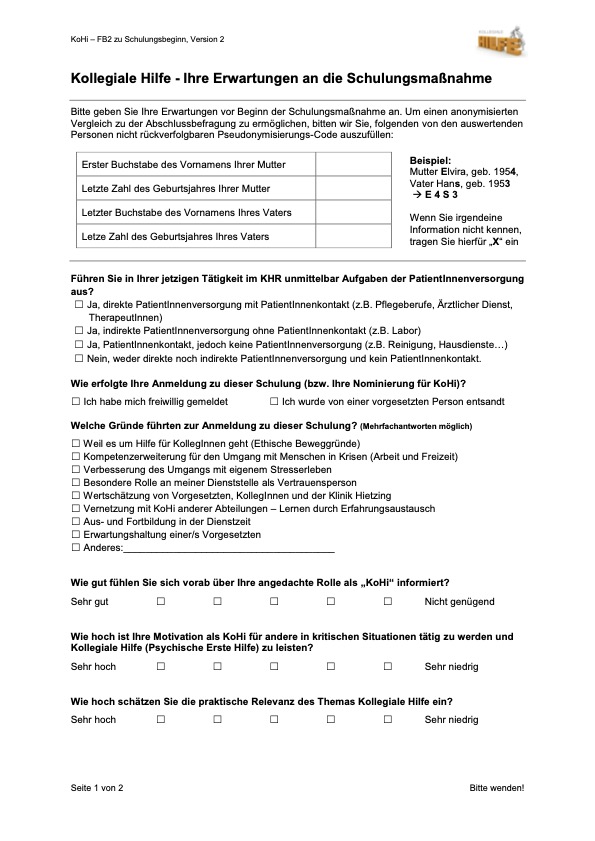


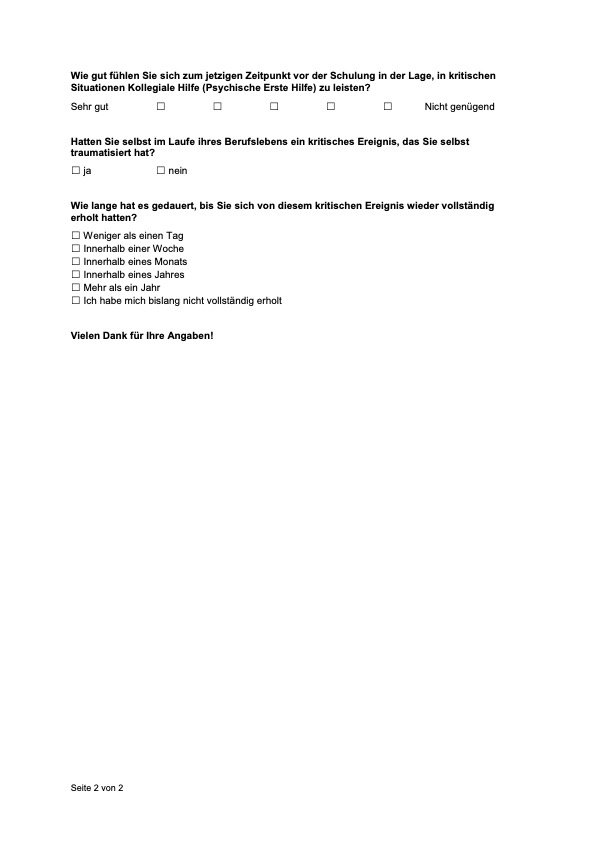


**Fragebogen 3a (FB 3a)**


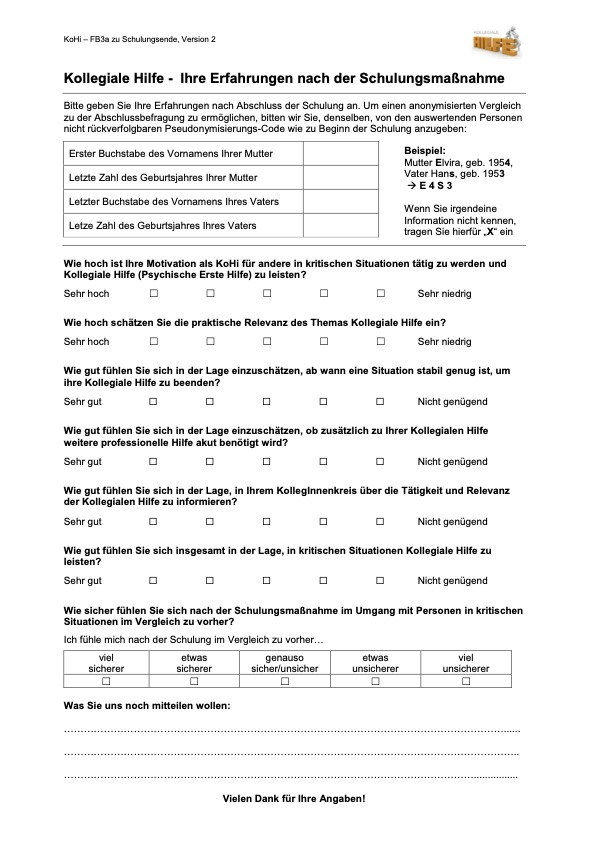

Supplement: MOESM1 [file 26136468]
